# Supplementary material
Source: Springer Nature journal article supplement (https://www.springermedizin.de/resource/supplementary/13020_2011_132_MOESM2_ESM.pdf/9641044)

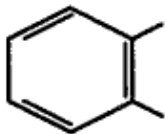

S

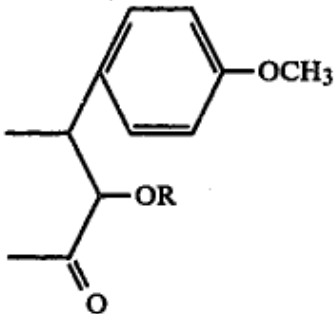

N  
H

Supplement: MOESM2 [file 9641044]
